# Supplementary material for: Pharmacological targeting of BET proteins attenuates radiation-induced lung fibrosis
Source: PubMed Central journal article supplement (PMC5772369; doi:10.1038/s41598-018-19343-9), 2018-01-17
Supplement: 41598_2018_19343_MOESM1_ESM.pdf [file 41598_2018_19343_MOESM1_ESM.pdf]

## Pharmacological targeting of BET proteins attenuates radiation-induced lung fibrosis

Jian Wang <sup>a, #</sup>, Fangzheng Zhou <sup>a, #</sup>, Zhenyu Li <sup>a</sup>, Hong Mei <sup>b</sup>, Ye Wang <sup>a</sup>, Hong Ma <sup>a</sup>,  
Liangliang Shi <sup>a</sup>, Ai Huang <sup>a</sup>, Tao Zhang <sup>a</sup>, Zhenyu Lin <sup>a, \*</sup>, Gang Wu <sup>a, \*</sup>

<sup>a</sup>Cancer Center, <sup>b</sup> Department of Pediatric Surgery, Union Hospital, Tongji Medical College, Huazhong University of Science and Technology, 1277 JieFang Avenue, Wuhan 430022, China

<sup>#</sup> Both authors contributed equally to this work.

<sup>\*</sup> These authors jointly directed this work. Correspondence should be addressed to Zhenyu Lin (unionlzy@126.com) or Gang Wu (xhzlwg@163.com)

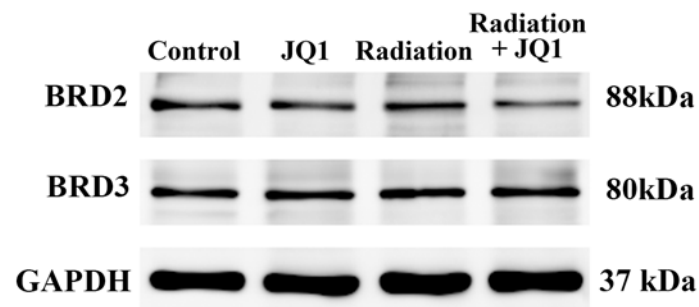

Figure S1: Expressions of BRD2 and BRD3 in right lung tissues from each group were analyzed at 20 weeks postirradiation. GAPDH was used as a loading control.
